# Supplementary material for: The Pteridaceae family diversity in Togo
Source: Biodivers Data J. 2015 Jul 15;(3):e5078. doi: 10.3897/BDJ.3.e5078 (PMC4549653; doi:10.3897/BDJ.3.e5078)
Supplement: Supplementary material 1 — Number of Pteridaceae species by gender in Togo [file biodiversity_data_journal-3-e5078-s001.xls]

## Sheet: Feuil1
Pteridaceae genus	Number of species
Acrostichum	1
Actiniopteris	1
Adiantum	4
Ceratopteris	1
Doryopteris	2
Haplopteris	1
Pellaea	1
Pityrogramma	1
Pteris	5
Total	17
